# Supplementary material for: Cooperative assembly of redistributed arylgermanium-bearing alkoxysilanes in a mesostructured siloxane network
Source: Royal Society of Chemistry journal article supplement (doi:10.1039/d2nj02868a), 2022-01-01

Electronic Supplementary Material (ESI) for New Journal of Chemistry

## Cooperative assembly of redistributed aryl-germanium bearing alkoxy silane in mesostructured siloxane network

Nadia Katir,<sup>a</sup> Jamal El Haskouri,<sup>b</sup> Pedro Amoros,<sup>b</sup> and Abdelkrim El Kadib.<sup>a,\*</sup>

<sup>a.</sup> *Euromed Research Center, Engineering Division, Euro-Med University of Fes (UEMF), Route de Meknes, Rond-point de Bensouda, 30070, Fès, Morocco.*

[a.elkadib@ueuromed.org](mailto:a.elkadib@ueuromed.org)

<sup>b.</sup> *Instituto de Ciencia de los Materials de la Universidad de Valencia, Calle catedratico José Beltran, 2 CP 46980 Paterna Valencia, Spain.*

**S1: Experimental section: Synthesis and characterization of Ph<sub>3</sub>GeSi, Ph<sub>2</sub>GeSi<sub>2</sub> and PhGeSi<sub>3</sub>**

**S2. Infrared spectra of bimetallic silyl-germyl precursors Ph<sub>3</sub>GeSi, Ph<sub>2</sub>GeSi<sub>2</sub> and PhGeSi<sub>3</sub>**

**S3. <sup>1</sup>H, <sup>13</sup>C and <sup>29</sup>Si NMR spectra of bimetallic silyl-germyl precursors Ph<sub>3</sub>GeSi, Ph<sub>2</sub>GeSi<sub>2</sub> and PhGeSi<sub>3</sub>**

**S4. CP MAS <sup>13</sup>C and <sup>29</sup>Si NMR spectra of Ph<sub>3</sub>GeSi@SiO<sub>2</sub>, Ph<sub>2</sub>GeSi<sub>2</sub>@SiO<sub>2</sub> and PhGeSi<sub>3</sub>@SiO<sub>2</sub>**

**S5. TGA curves of Ph<sub>3</sub>GeSi@SiO<sub>2</sub>, Ph<sub>2</sub>GeSi<sub>2</sub>@SiO<sub>2</sub> and PhGeSi<sub>3</sub>@SiO<sub>2</sub>**

**S6. Scanning electronic microscopy analyses of Ph<sub>3</sub>GeSi@PhSiO<sub>2</sub>**

**S7. Digital photos of CS-Ph<sub>3</sub>GeSi@SiO<sub>2</sub>, CS-Ph<sub>2</sub>GeSi<sub>2</sub>@SiO<sub>2</sub> and CS-PhGeSi<sub>3</sub>@SiO<sub>2</sub> solutions**

**S8. Infrared spectra of CS-Ph<sub>3</sub>GeSi@SiO<sub>2-f</sub>, CS-Ph<sub>2</sub>GeSi<sub>2</sub>@SiO<sub>2-f</sub> and CS-PhGeSi<sub>3</sub>@SiO<sub>2-f</sub>**

**S9. EDX of CS-Ph<sub>3</sub>GeSi@SiO<sub>2-f</sub>, CS-Ph<sub>2</sub>GeSi<sub>2</sub>@SiO<sub>2-f</sub> and CS-PhGeSi<sub>3</sub>@SiO<sub>2-f</sub>**

**S10. Digital photos and Infrared spectra of CS-Ph<sub>3</sub>GeSi@SiO<sub>2-f-150</sub>°C, CS-Ph<sub>2</sub>GeSi<sub>2</sub>@SiO<sub>2-f-150</sub>°C and CS-PhGeSi<sub>3</sub>@SiO<sub>2-f-150</sub>°C**

## S1: Experimental section:

### S1a: Synthesis and characterization of $\text{Ph}_3\text{GeSi}$ , $\text{Ph}_2\text{GeSi}_2$ and $\text{PhGeSi}_3$

#### Synthesis and characterization of $\text{Ph}_3\text{GeSi}$

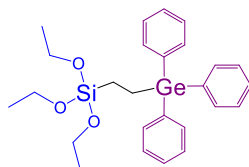

A solution of triethoxyvinylsilane (0.46 g, 2.42 mmol) and triphenylgermane (0.75 g, 2.45 mmol) in toluene (2 ml) was heated in the presence of AIBN at 90°C for 2h. After evaporation of solvent,  $\text{Ph}_3\text{GeSi}$  (1.10 g, 91%) was obtained as a white powder. M.p. 57 °C;  $\delta_{\text{H}}$ (300.13 MHz;  $\text{CDCl}_3$ ;  $\text{Me}_4\text{Si}$ ) 0.69-0.75 (2 H, m,  $\text{CH}_2\text{-Si}$ ), 1.12 (9 H, t,  $J$  7.0,  $\text{OCH}_2\text{-CH}_3$ ), 1.48-1.54 (2 H, m, ( $\text{CH}_2\text{-Ge}$ ), 3.71 (6 H, q,  $J$  7.0,  $\text{OCH}_2\text{-CH}_3$ ), 7.25-7.41 (15 H, m,  $\text{C}_6\text{H}_5$ );  $\delta_{\text{C}}$ (75.48 MHz;  $\text{CDCl}_3$ ;  $\text{Me}_4\text{Si}$ ) 4.71 ( $\text{CH}_2\text{-Si}$ ), 5.84 ( $\text{CH}_2\text{-Ge}$ ), 18.51 ( $\text{OCH}_2\text{CH}_3$ ), 58.62 ( $\text{OCH}_2\text{CH}_3$ ), 128.36 ( $\text{C}_m$ ), 129.04 ( $\text{C}_p$ ), 135.19 ( $\text{C}_o$ ), 137.11 ( $\text{C}_{\text{ipso}}$ );  $\delta_{\text{Si}}$ (59.62 MHz;  $\text{CDCl}_3$ ;  $\text{Me}_4\text{Si}$ ) -45.88; MS (EI):  $m/z$  = 496 (1)  $[\text{M}]^+$ .

#### Synthesis and characterization of $\text{Ph}_2\text{GeSi}_2$

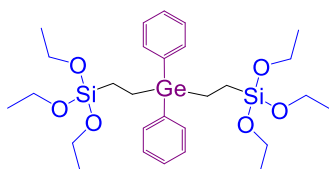

A solution of triethoxyvinylsilane (1.86 g, 9.78 mmol) and diphenylgermane (1.13 g, 4.91 mmol) in toluene (5 mL) was heated in the presence of AIBN at 90°C for 2h. After evaporation of solvent and distillation under reduced pressure,  $\text{Ph}_2\text{GeSi}_2$  (2.70 g, 90%) was obtained as a colorless liquid. Bp: 140°C / 0.3 mmHg;  $\delta_{\text{H}}$ (300.13 MHz;  $\text{CDCl}_3$ ;  $\text{Me}_4\text{Si}$ ) 0.59-0.64 (4 H, m,  $\text{CH}_2\text{-Si}$ ), 1.13 (18 H, t,  $J$  7.0,  $\text{OCH}_2\text{-CH}_3$ ), 1.20-1.27 (4 H, m, ( $\text{CH}_2\text{-Ge}$ ), 3.72 (12 H, q,  $J$  7.0,  $\text{OCH}_2\text{-CH}_3$ ), 7.24-7.27 (6 H, m,  $\text{C}_6\text{H}_5$ ), 7.36-7.38 (4 H, m,  $\text{C}_6\text{H}_5$ );  $\delta_{\text{C}}$ (75.48 MHz;  $\text{CDCl}_3$ ;  $\text{Me}_4\text{Si}$ ) 4.28 ( $\text{Si-CH}_2\text{-CH}_2\text{-Ge}$ ), 18.40 ( $\text{OCH}_2\text{CH}_3$ ), 58.51 ( $\text{OCH}_2\text{CH}_3$ ), 128.11 ( $\text{C}_m$ ), 128.66 ( $\text{C}_p$ ), 134.71( $\text{C}_o$ ), 137.93 ( $\text{C}_{\text{ipso}}$ );  $\delta_{\text{Si}}$ (59.62 MHz;  $\text{CDCl}_3$ ;  $\text{Me}_4\text{Si}$ ) -45.77; MS (EI):  $m/z$  = 533 (3)  $[\text{M-Ph}]^+$ .

#### Synthesis and characterization of $\text{PhGeSi}_3$

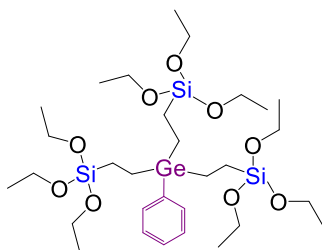

A solution of triethoxyvinylsilane (2.36 g, 12.42 mmol) and phenylgermane (0.63 g, 4.12 mmol) in toluene (5 ml) was heated in the presence of AIBN at 90°C for 3h. After evaporation of solvent and distillation under reduced pressure,  $\text{PhGeSi}_3$  (2.62 g, 88 %) was obtained as a colorless liquid. Bp: 140°C/0.04 mmHg;  $\delta_{\text{H}}$ (300.13 MHz;  $\text{CDCl}_3$ ;  $\text{Me}_4\text{Si}$ ) 0.55-0.61 (6 H, m,  $\text{CH}_2\text{-Si}$ ), 0.96-1.02 (6 H, m,  $\text{CH}_2\text{-Ge}$ ), 1.15 (27 H, t,  $J$  7.0,  $\text{OCH}_2\text{-CH}_3$ ), 3.71 (18 H, q,  $J$  7.0,  $\text{OCH}_2\text{-CH}_3$ ), 7.22-7.26 (3 H, m,  $\text{C}_6\text{H}_5$ ), 7.33-7.35 (2 H, m,  $\text{C}_6\text{H}_5$ );  $\delta_{\text{C}}$ (75.48 MHz;  $\text{CDCl}_3$ ;  $\text{Me}_4\text{Si}$ ) 2.14, 3.16 ( $\text{Si-CH}_2\text{-CH}_2\text{-Ge}$ ), 17.27 ( $\text{OCH}_2\text{CH}_3$ ), 57.35

(OCH<sub>2</sub>CH<sub>3</sub>), 126.81 (C<sub>m</sub>), 127.18 (C<sub>p</sub>), 133.07 (C<sub>o</sub>), 137.98 (C<sub>ipso</sub>);  $\delta_{\text{Si}}$ (59.62 MHz; CDCl<sub>3</sub>; Me<sub>4</sub>Si) -45.72; MS (EI):  $m/z = 724$  (1) [M]<sup>+</sup>.

### **S1b: Synthesis of Ph<sub>3</sub>GeSi@SiO<sub>2</sub>, Ph<sub>2</sub>GeSi<sub>2</sub>@SiO<sub>2</sub> and PhGeSi<sub>3</sub>@SiO<sub>2</sub>**

#### ***Synthesis of Ph<sub>3</sub>GeSi@SiO<sub>2</sub>***

The Pluronic P123 (0.9 g) was dissolved in an aqueous HCl solution (5.1 g of HCl 37%, in 25 g H<sub>2</sub>O) with stirring at room temperature for 4 h. TEOS (1.89 g, 9.09 mmol) was added dropwise to this homogeneous solution. After 15 min, the **Ph<sub>3</sub>GeSi** precursor (0.5 g, 1.01 mmol of Si) was added to the reaction mixture. The resulting mixture was kept stirring at 40 °C for 20 h and heated at 100°C under static conditions for an additional 24 h. After cooling, the solid product was recovered by filtration, successively washed with deionized water and ethanol to neutrality, and drying in air at 60 °C for 12 h giving 1.6 g of material as a white powder. The surfactant was removed by extraction in a Soxhlet with 250 mL of ethanol containing 2 mL of 37 % HCl aqueous solution at reflux temperature for 72 h. The recovered solid was washed with ethanol and air-dried at 60 °C.

#### ***Synthesis of Ph<sub>2</sub>GeSi<sub>2</sub>@SiO<sub>2</sub>***

The Pluronic P123 (1.46 g) was dissolved in an aqueous HCl solution (8.18 g of HCl 37%, in 36 g H<sub>2</sub>O) with stirring at room temperature for 4 h. TEOS (3.07 g, 14.76 mmol) was added dropwise to this homogeneous solution. After 15 min, the **Ph<sub>2</sub>GeSi<sub>2</sub>** precursor (0.5 g, 0.82 mmol of Si) was added to the reaction mixture. The resulting mixture was kept stirring at 40 °C for 20 h and heated at 100°C under static conditions for an additional 24 h. After cooling, the solid product was recovered by filtration, successively washed with deionized water and ethanol to neutrality, and drying in air at 60 °C for 12 h giving 2.2 g of material as a white powder. The surfactant was removed by extraction in a Soxhlet with 250 mL of ethanol containing 2 mL of 37 % HCl aqueous solution at reflux temperature for 72 h. The recovered solid was washed with ethanol and air-dried at 60 °C.

#### ***Synthesis of PhGeSi<sub>3</sub>@SiO<sub>2</sub>***

The Pluronic P123 (1.84 g) was dissolved in an aqueous HCl solution (10.28 g of HCl 37%, in 46 g H<sub>2</sub>O) with stirring at room temperature for 4 h. TEOS (3.88 g, 18.65 mmol) was added dropwise to this homogeneous solution. After 15 min, the **PhGeSi<sub>3</sub>** precursor (0.5 g, 0.69 mmol of Si) was added to the reaction mixture. The resulting mixture was kept stirring at 40 °C for 20 h and heated at 100°C under static conditions for an additional 24 h. After cooling, the solid product was recovered by filtration, successively washed with deionized water and ethanol to neutrality, and drying in air at 60 °C for 12 h giving 2.33 g of material as a white powder. The surfactant was removed by extraction in a Soxhlet with 250 mL of ethanol containing 2 mL of 37 % HCl aqueous solution at reflux temperature for 72 h. The recovered solid was washed with ethanol and air-dried at 60 °C.

### **S1c: Preparation of Chitosan–Ph<sub>n</sub>GeSi<sub>4-n</sub>@SiO<sub>2</sub> Films.**

#### ***Preparation of CS–Ph<sub>3</sub>GeSi@SiO<sub>2</sub>-f***

50 mg of chitosan was completely dissolved in 4 mL of 1% (v/v) acetic acid solution, and the mixture was kept under vigorous stirring for 120 min. tetraethylorthosilicate (7 mg) and **Ph<sub>3</sub>GeSi** (7 mg) were added to the chitosan solution, and the resulting mixture was stirred for an additional 90 min. The resulting solution was cast into plastic Petri dishes allowing solvent removal and film formation after complete drying.

#### ***Preparation of CS–Ph<sub>2</sub>GeSi<sub>2</sub>@SiO<sub>2</sub>-f***

50 mg of chitosan was completely dissolved in 4 mL of 1% (v/v) acetic acid solution, and the mixture was kept under vigorous stirring for 120 min. tetraethylorthosilicate (8.8 mg) and **Ph<sub>2</sub>GeSi<sub>2</sub>** (8.8 mg) were added to the chitosan solution, and the resulting mixture was stirred for an additional 90 min. The resulting solution was cast into plastic Petri dishes allowing solvent removal and film formation after complete drying.

#### ***Preparation of CS–PhGeSi<sub>3</sub>@SiO<sub>2</sub>-f***

50 mg of chitosan was completely dissolved in 4 mL of 1% (v/v) acetic acid solution, and the mixture was kept under vigorous stirring for 120 min. tetraethylorthosilicate (10.5 mg) and **PhGeSi<sub>3</sub>** (10.5 mg) were added to the chitosan solution, and the resulting mixture was stirred for an additional 90 min. The resulting solution was cast into plastic Petri dishes allowing solvent removal and film formation after complete drying.

## S2. Infrared spectra of bimetallic silyl-germyl precursors $\text{Ph}_3\text{GeSi}$ , $\text{Ph}_2\text{GeSi}_2$ and $\text{PhGeSi}_3$

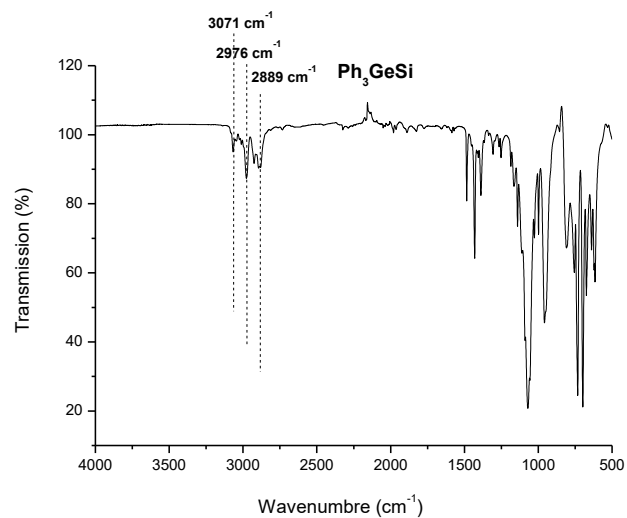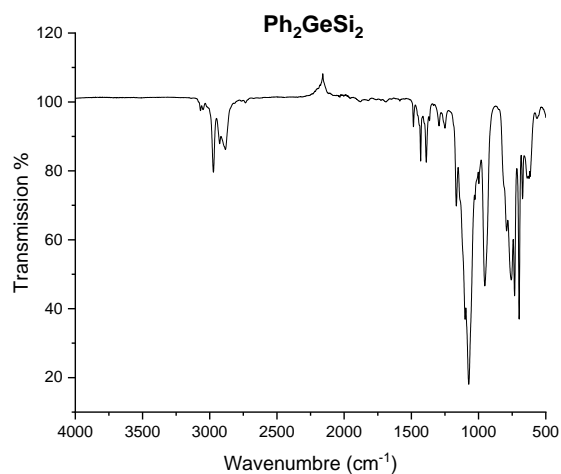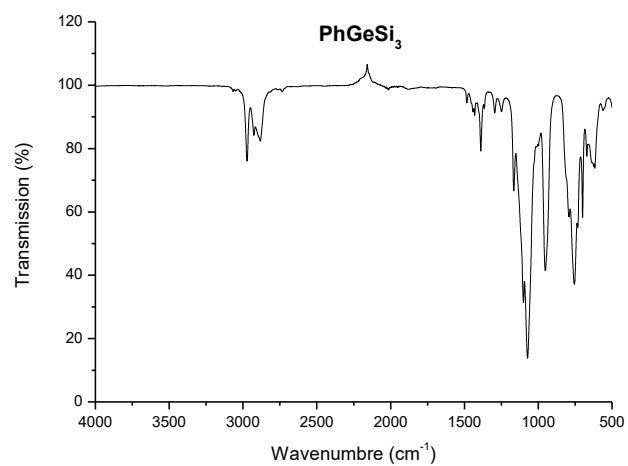

**S3.**  $^1\text{H}$ ,  $^{13}\text{C}$  and  $^{29}\text{Si}$  NMR spectra of bimetallic silyl-germyl precursors  **$\text{Ph}_3\text{GeSi}$** ,  **$\text{Ph}_2\text{GeSi}_2$**  and  **$\text{PhGeSi}_3$**

**$\text{Ph}_3\text{GeSi}$**

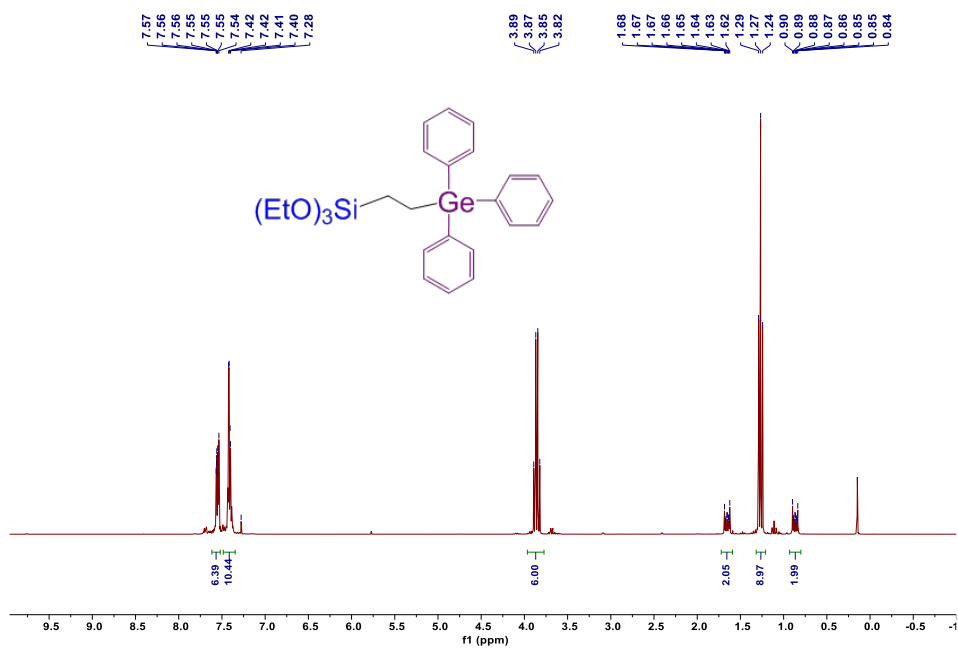

**$\text{Ph}_2\text{GeSi}_2$**

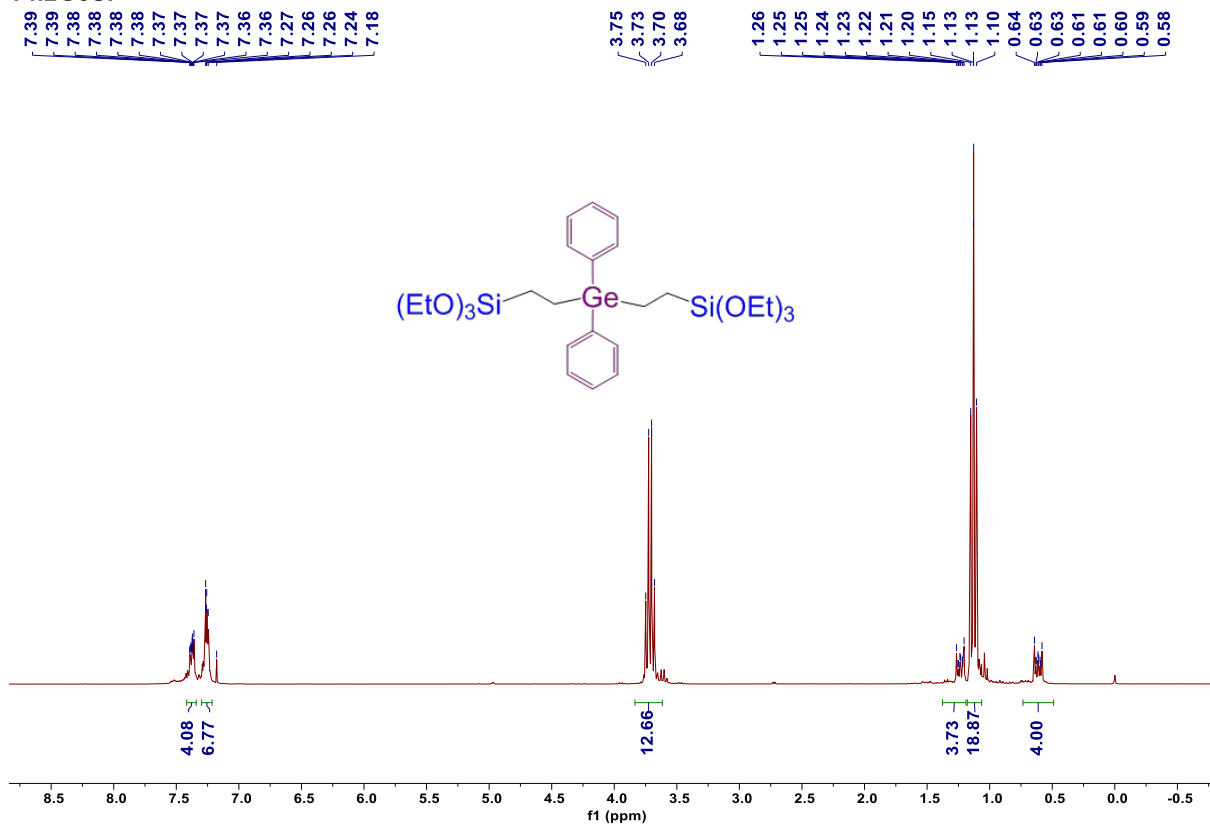

**PhGeSi3**

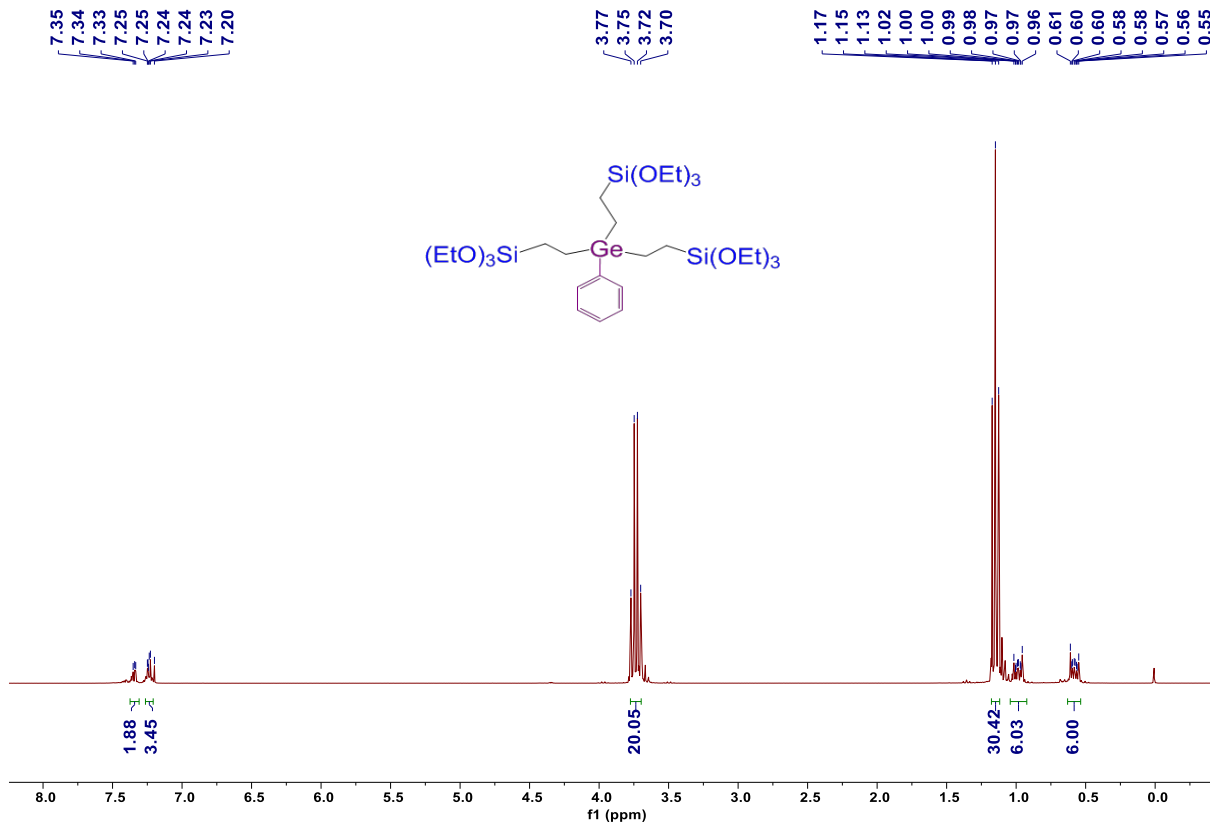

**Ph3GeSi**

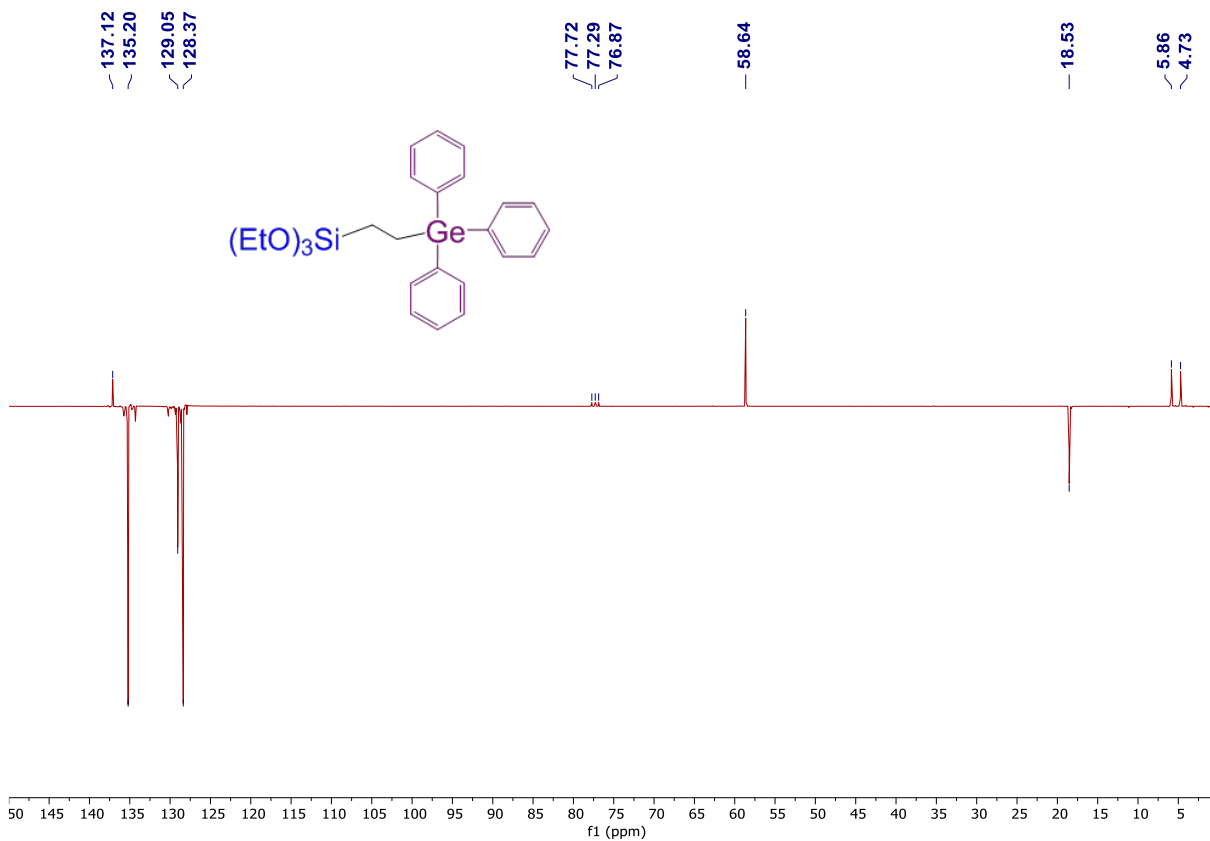

### Ph<sub>2</sub>GeSi<sub>2</sub>

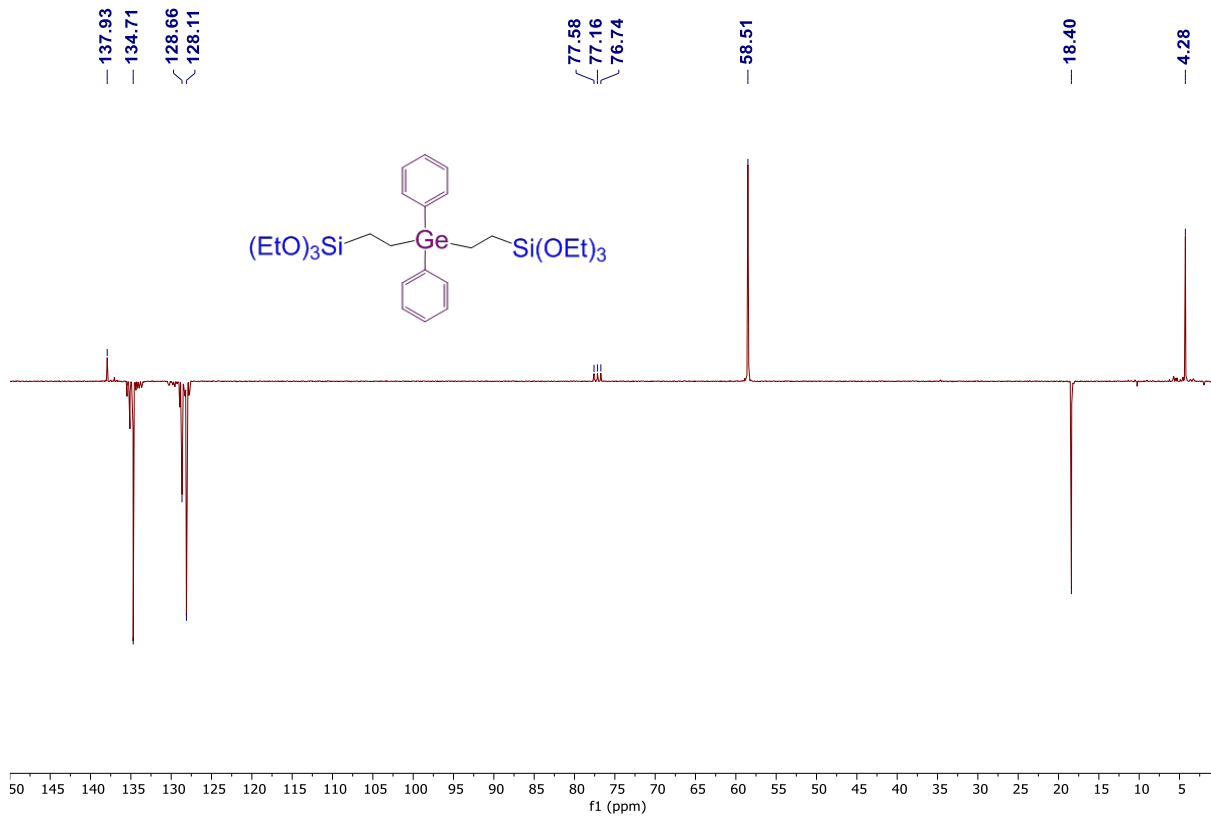

### PhGeSi<sub>3</sub>

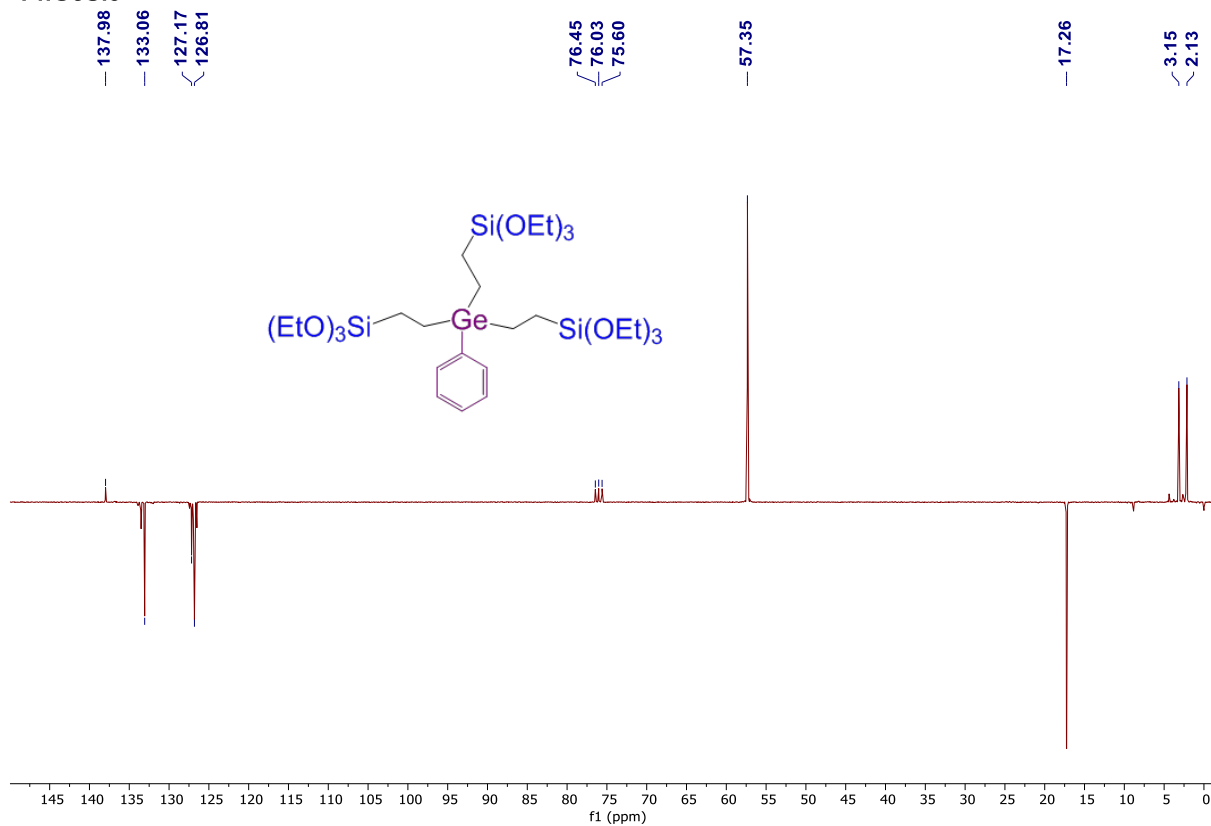



### Ph3GeSi

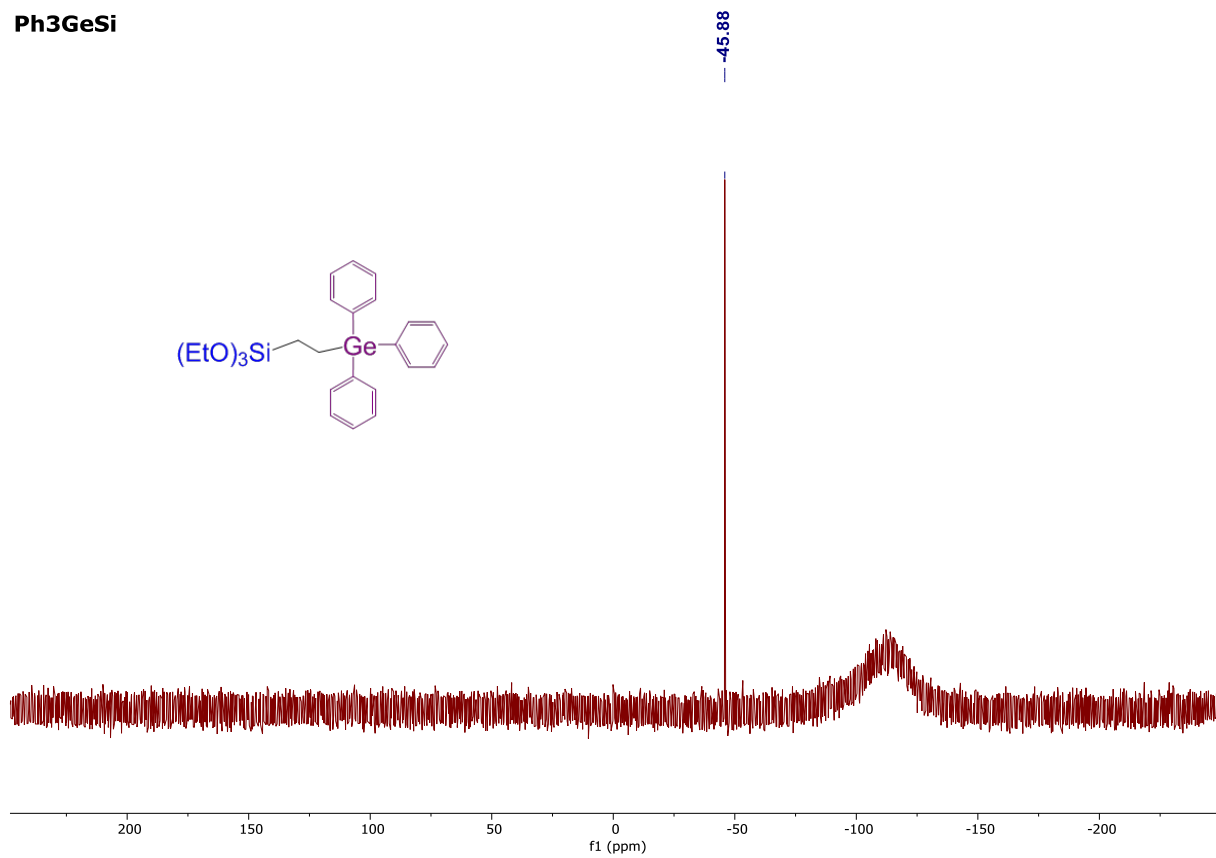

### Ph2GeSi2

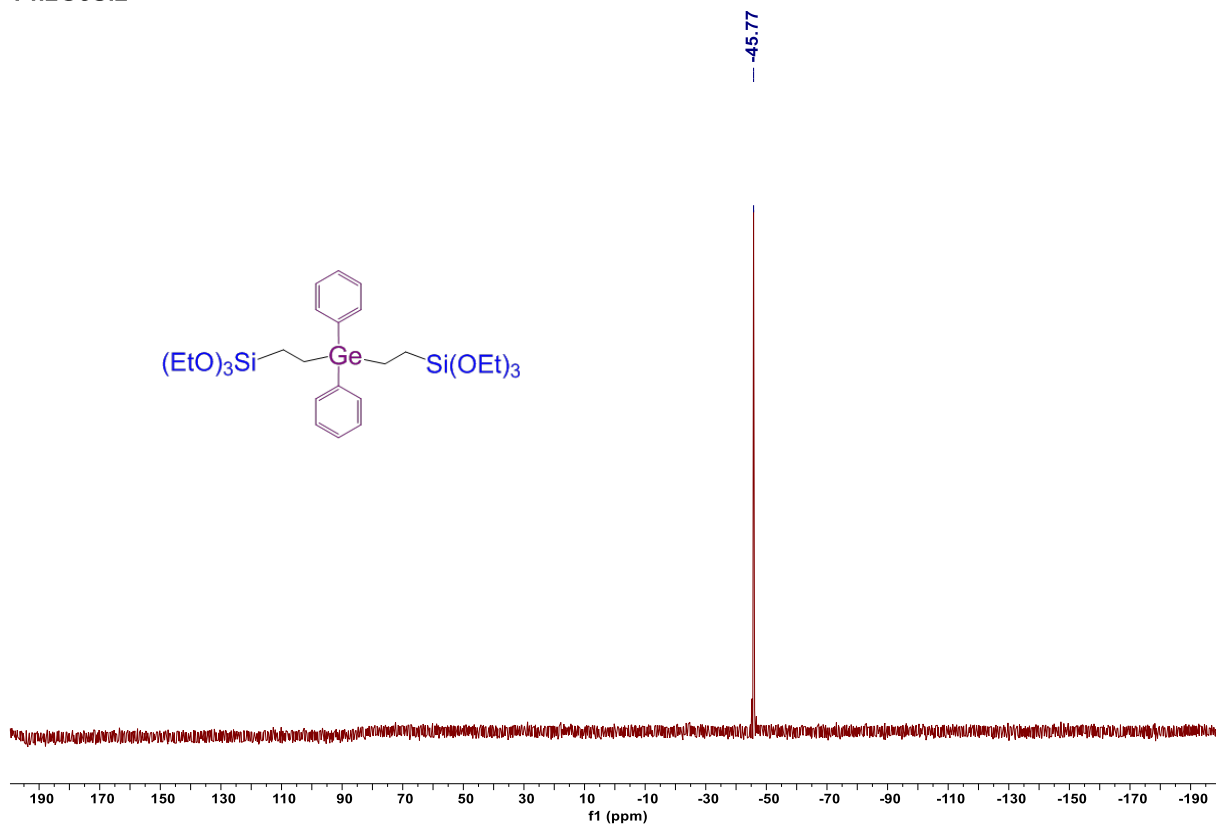

PhGeSi3

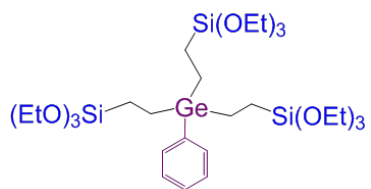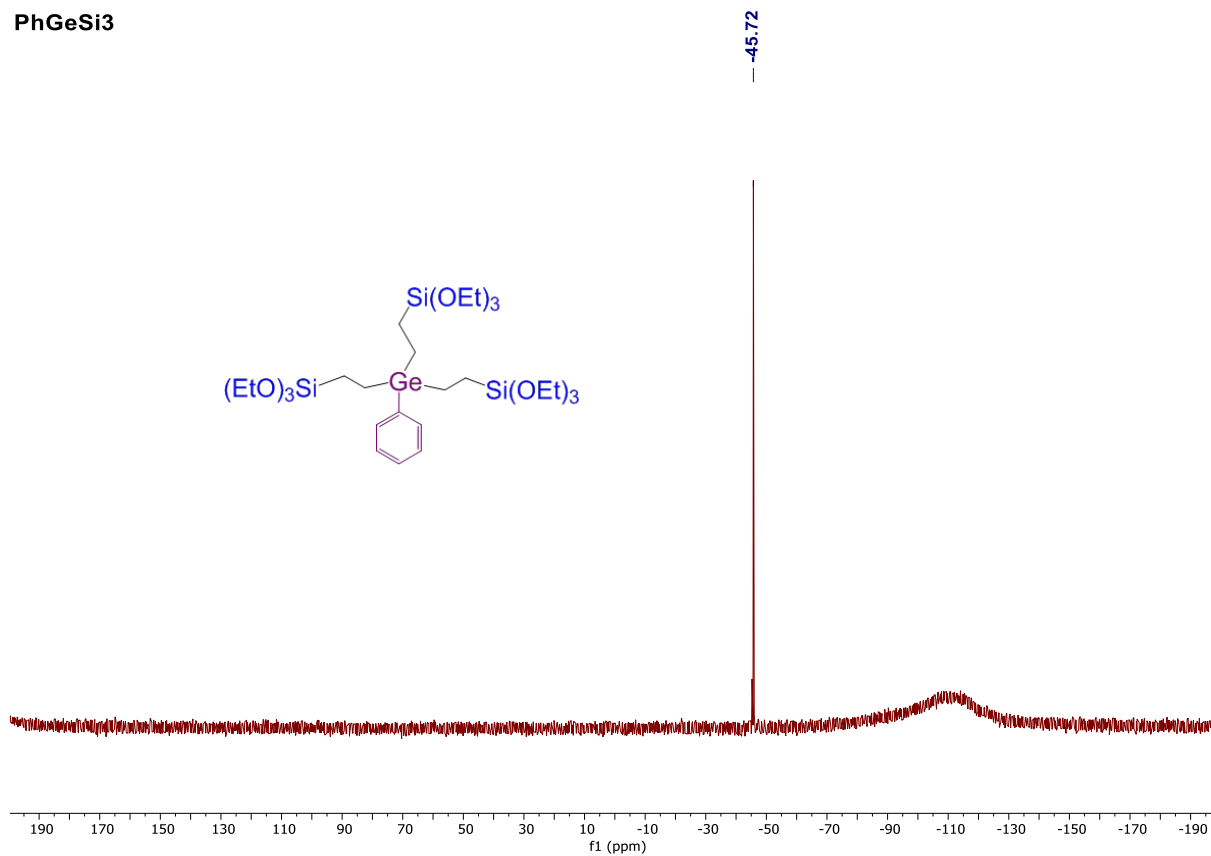

S4. CP MAS  $^{13}\text{C}$  and  $^{29}\text{Si}$  NMR spectra of  $\text{Ph}_3\text{GeSi@SiO}_2$ ,  $\text{Ph}_2\text{GeSi}_2\text{@SiO}_2$  and  $\text{PhGeSi}_3\text{@SiO}_2$

**Ph3GeSi@SiO2**

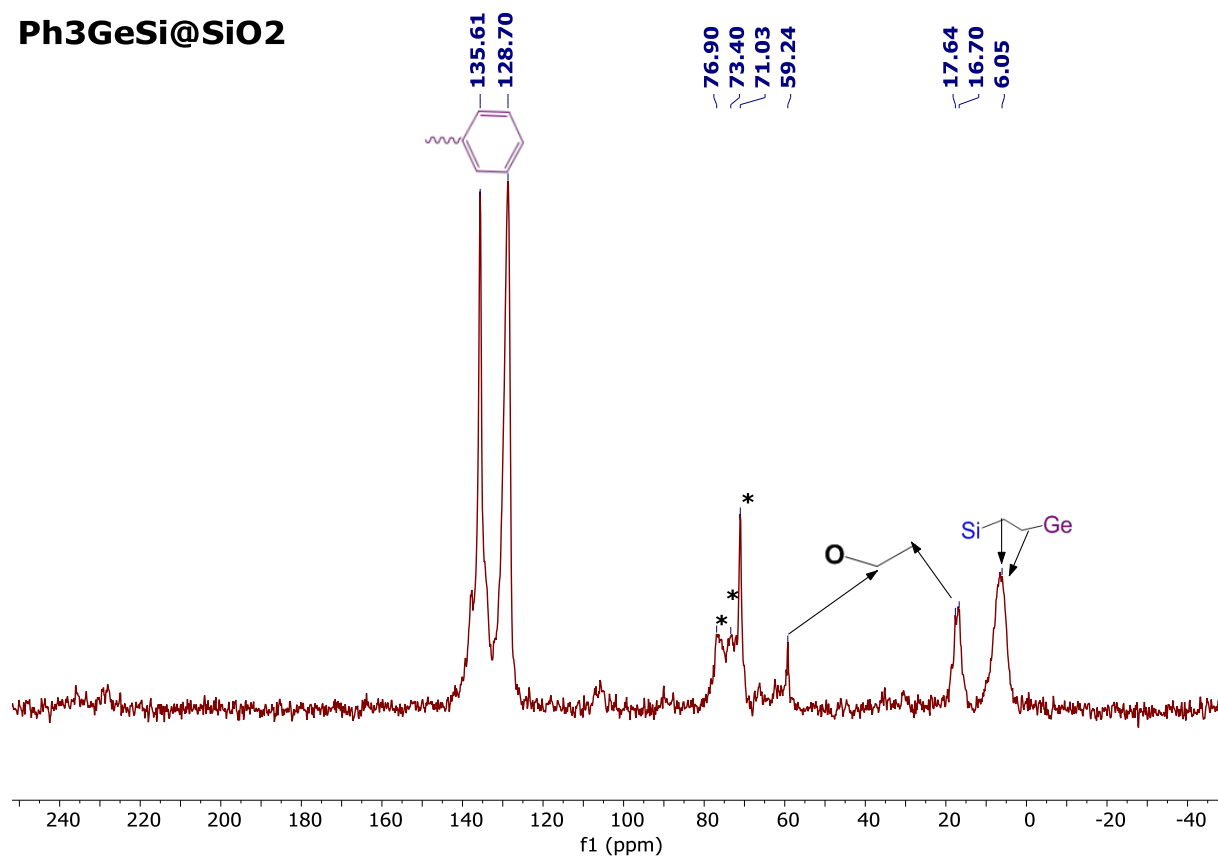

### Ph<sub>2</sub>GeSi<sub>2</sub>@SiO<sub>2</sub>

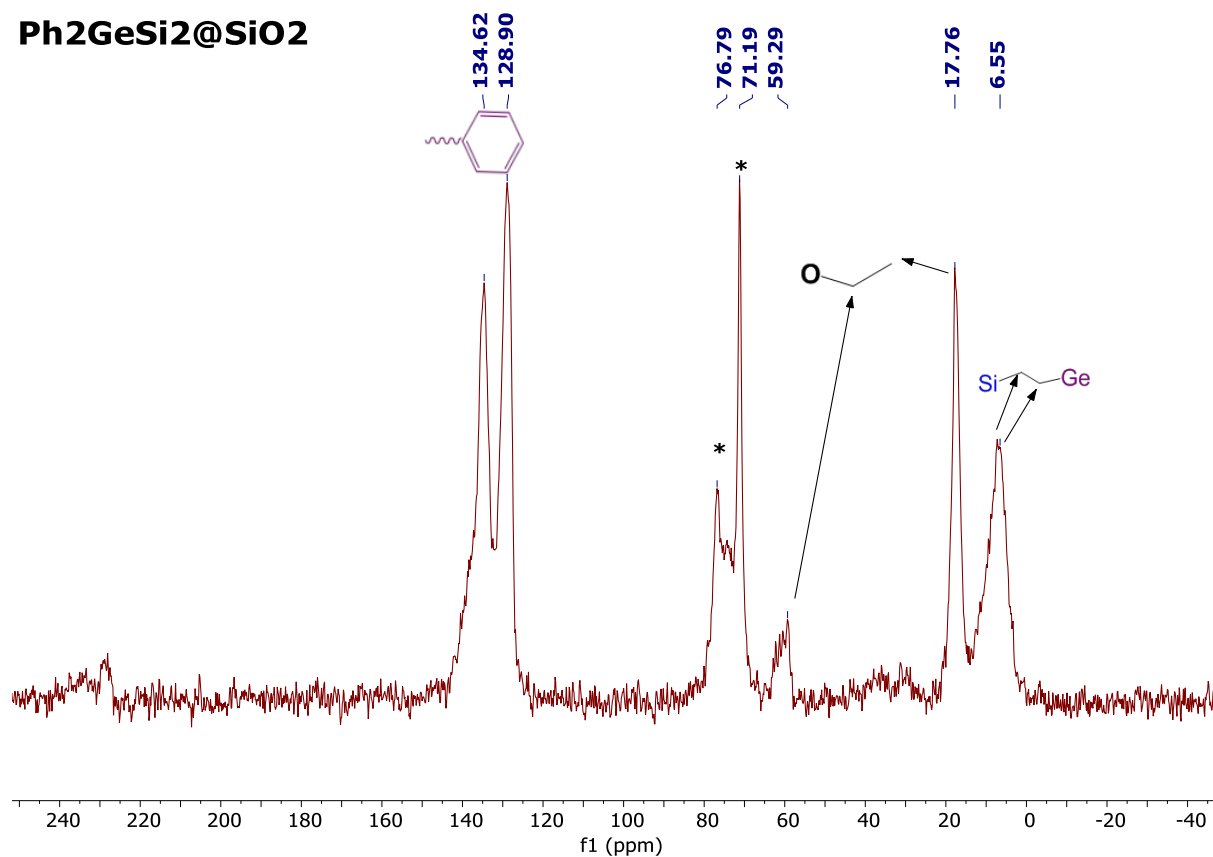

### PhGeSi<sub>3</sub>@SiO<sub>2</sub>

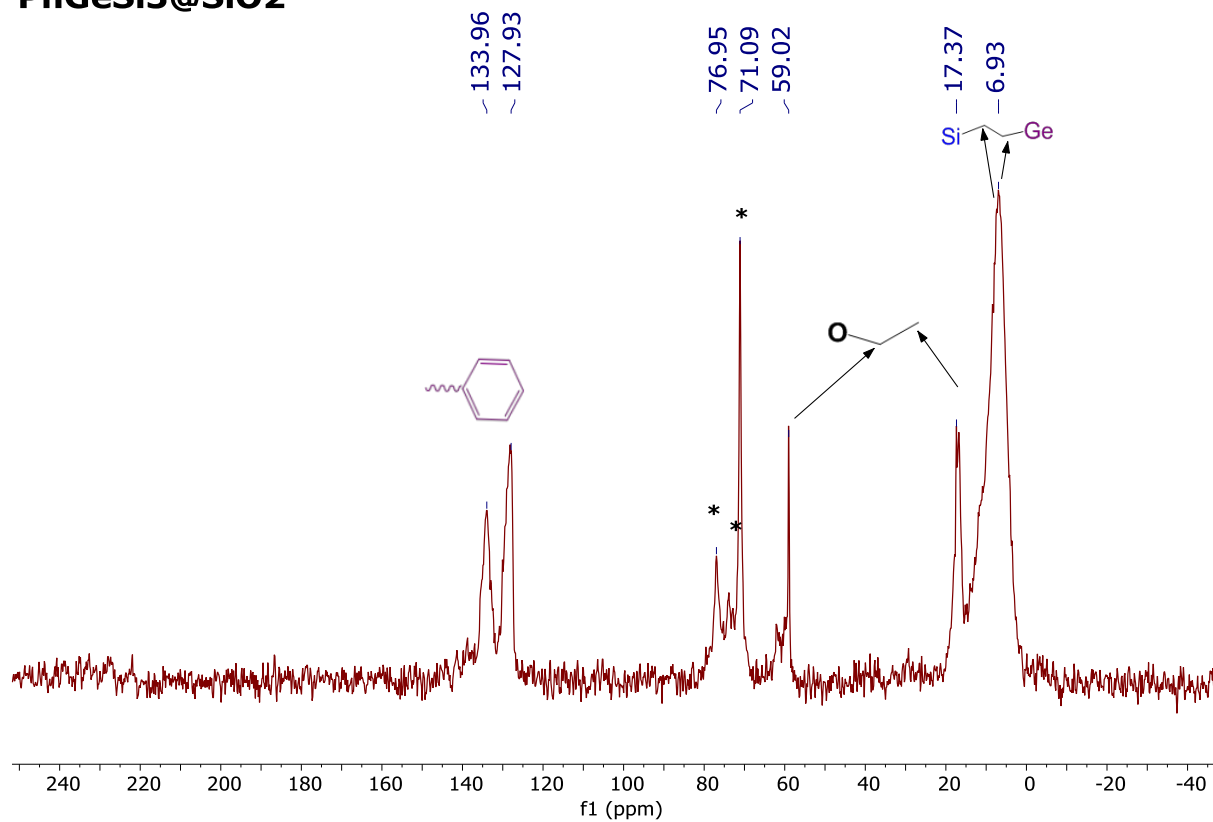

### Ph3GeSi@SiO2

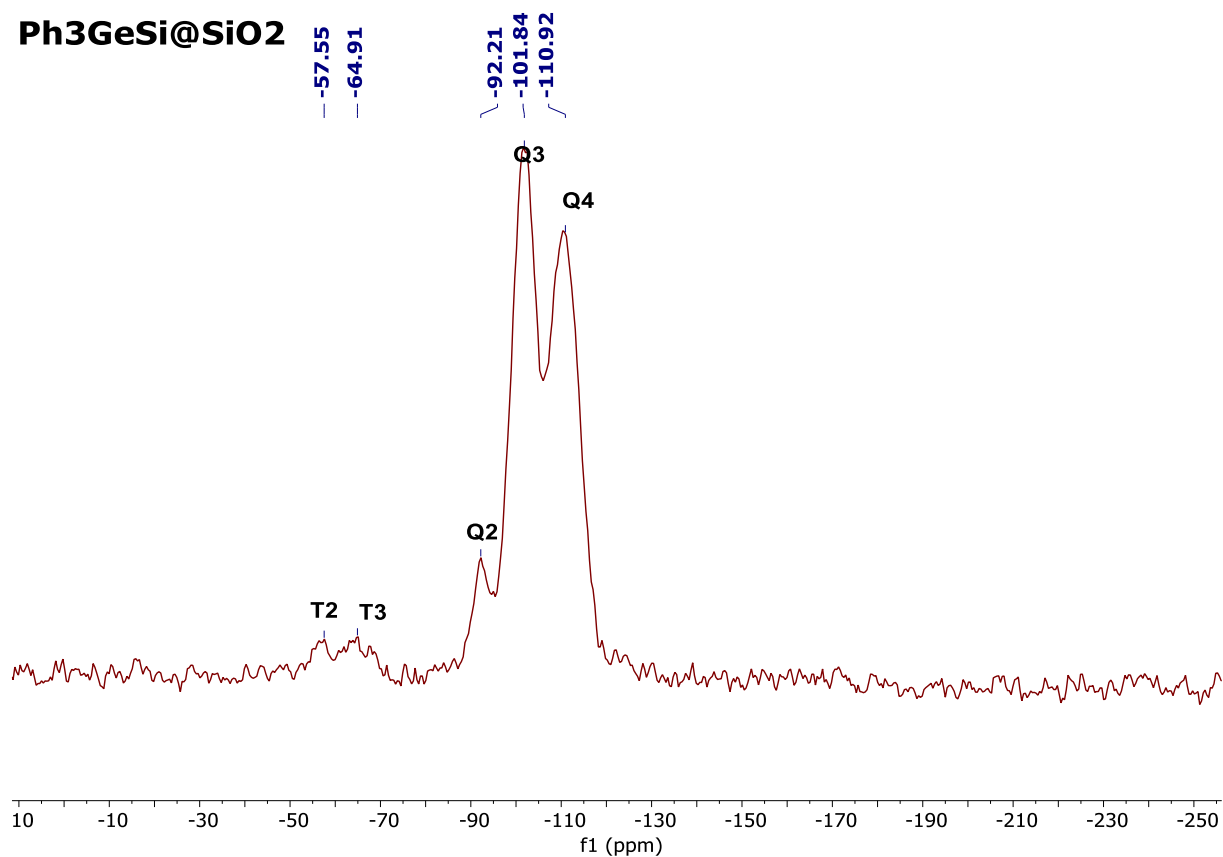

### Ph2GeSi2@SiO2

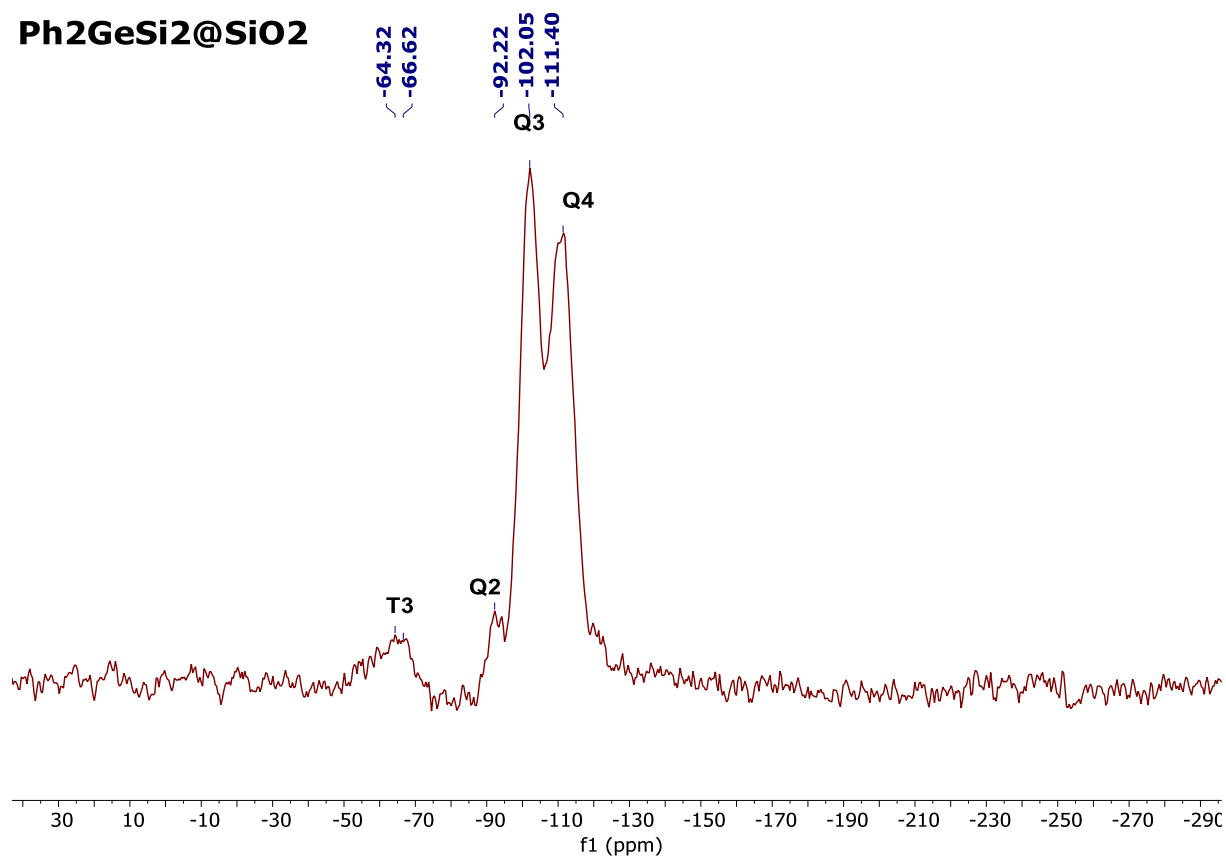

# PhGeSi3@SiO2

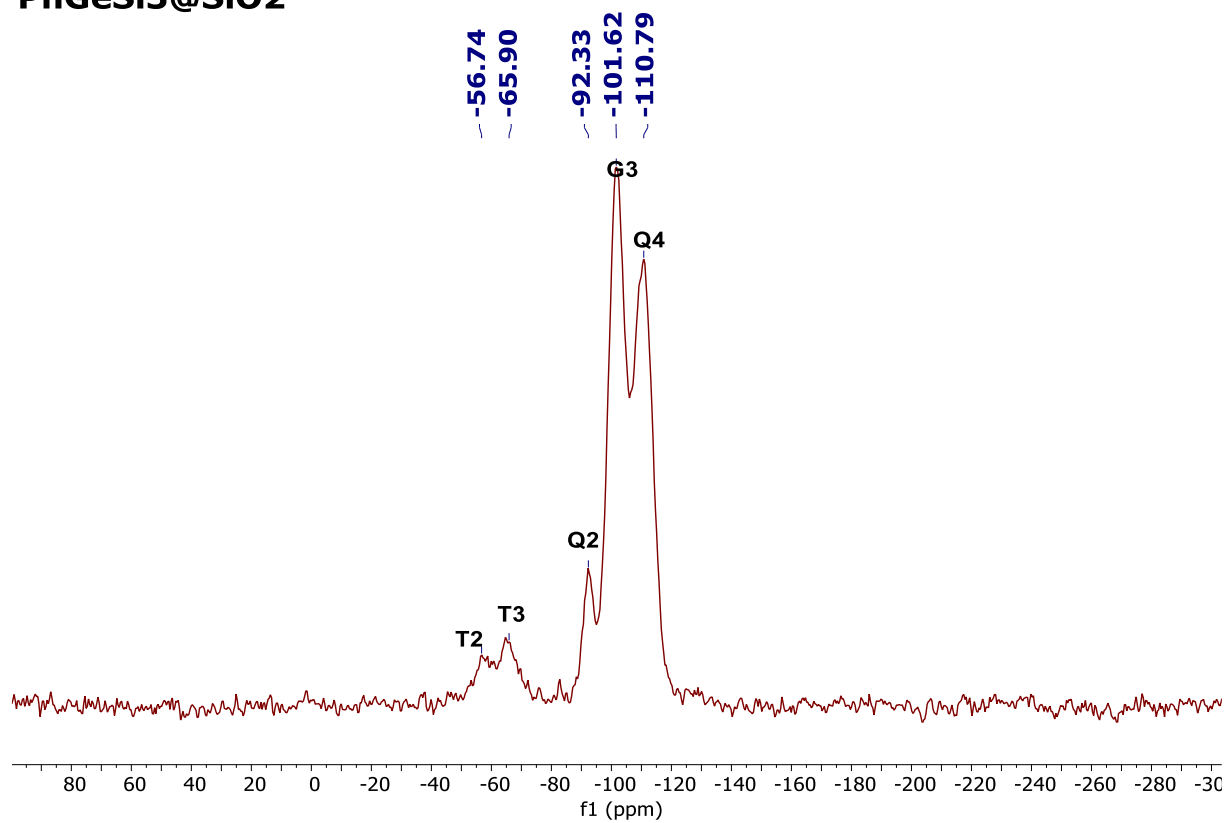

S5. TGA curves of  $\text{Ph}_3\text{GeSi@SiO}_2$ ,  $\text{Ph}_2\text{GeSi}_2\text{@SiO}_2$  and  $\text{PhGeSi}_3\text{@SiO}_2$

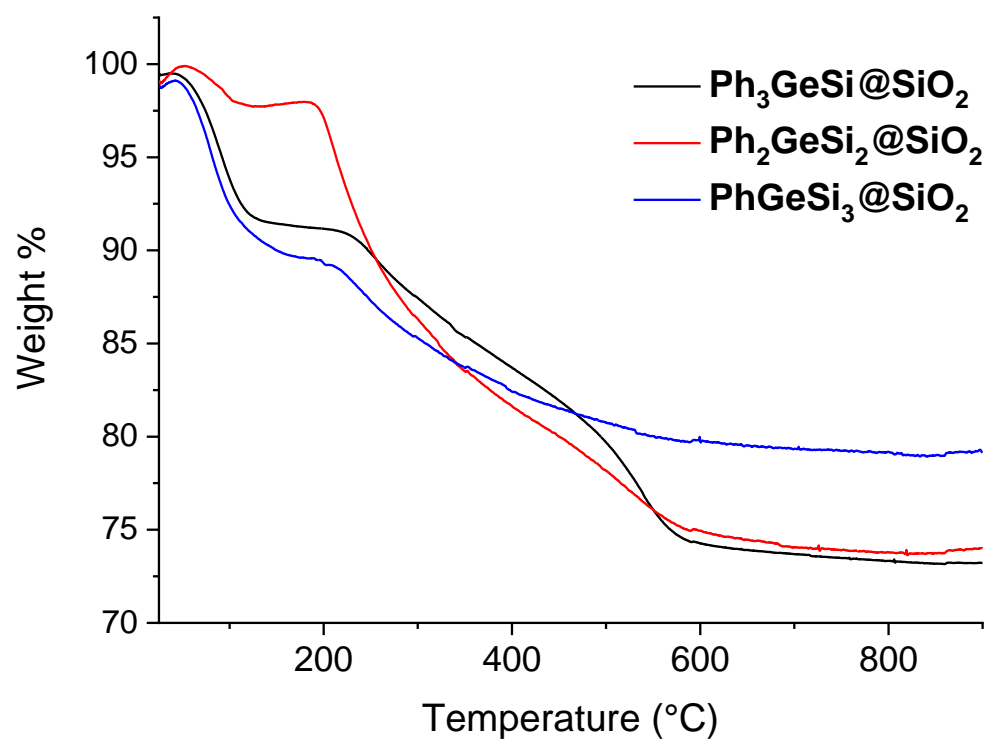

S6. Scanning electronic microscopy analyses of  $Ph_3GeSi@PhSiO_2$

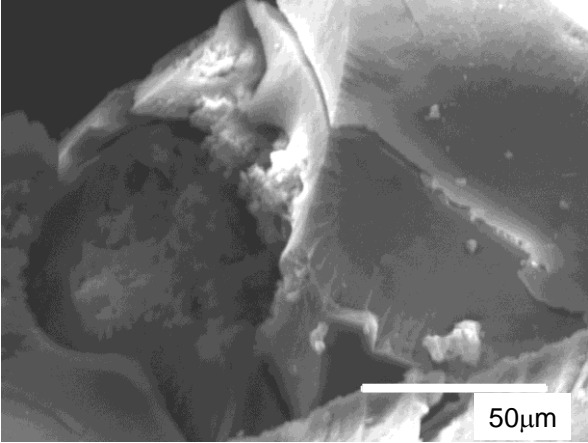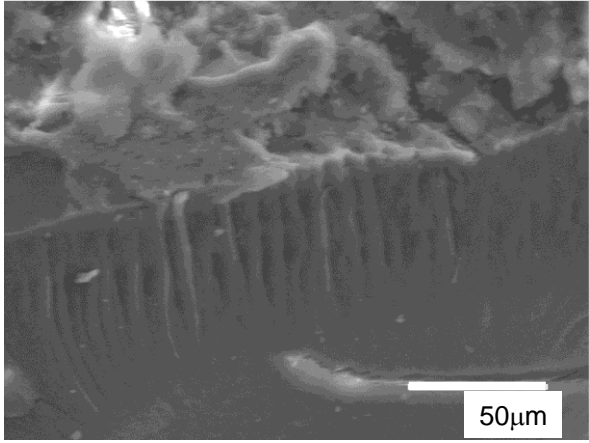



S7. Digital photos of, **CS-Ph<sub>3</sub>GeSi@SiO<sub>2</sub>**, **CS-Ph<sub>2</sub>GeSi<sub>2</sub>@SiO<sub>2</sub>** and **CS-PhGeSi<sub>3</sub>@SiO<sub>2</sub>** solutions

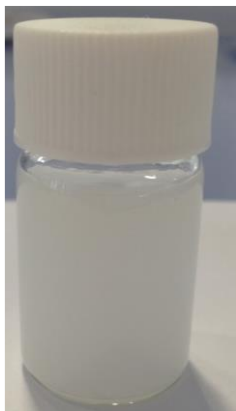

CS-Ph<sub>3</sub>GeSi@SiO<sub>2</sub>

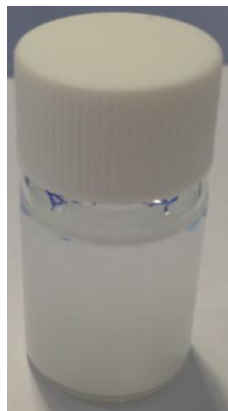

CS-Ph<sub>2</sub>GeSi<sub>2</sub>@SiO<sub>2</sub>

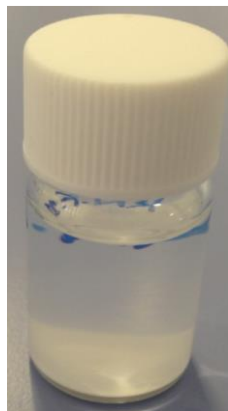

CS-PhGeSi<sub>3</sub>@SiO<sub>2</sub>

**S8. Infrared spectra of CS-Ph<sub>3</sub>GeSi@SiO<sub>2</sub>-f, CS-Ph<sub>2</sub>GeSi<sub>2</sub>@SiO<sub>2</sub>-f and CS-PhGeSi<sub>3</sub>@SiO<sub>2</sub>-f**

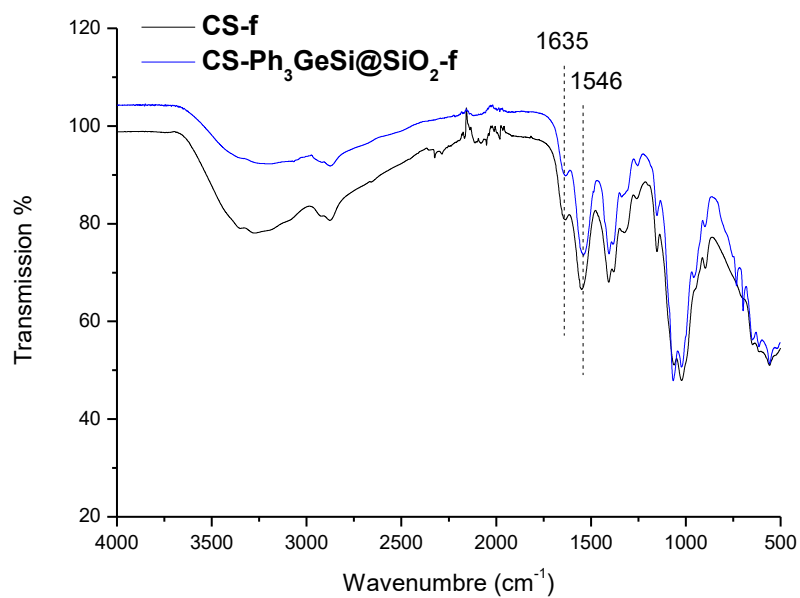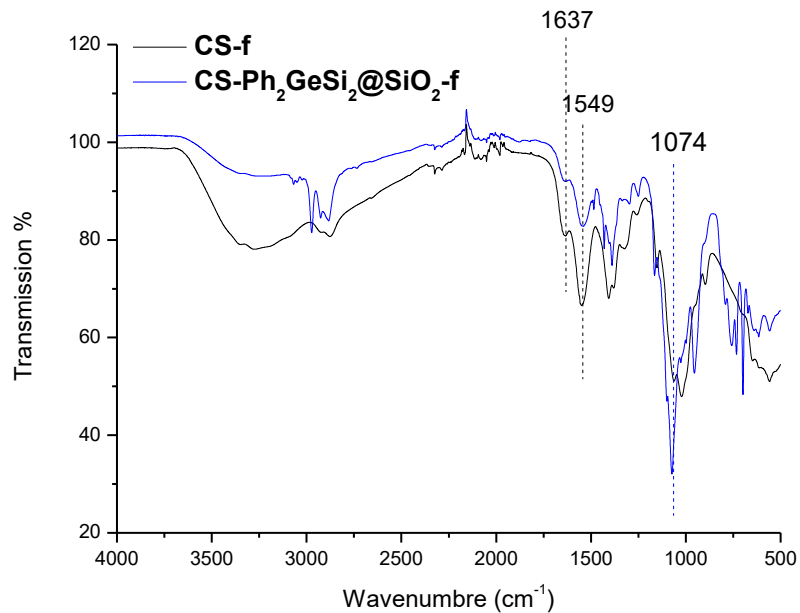

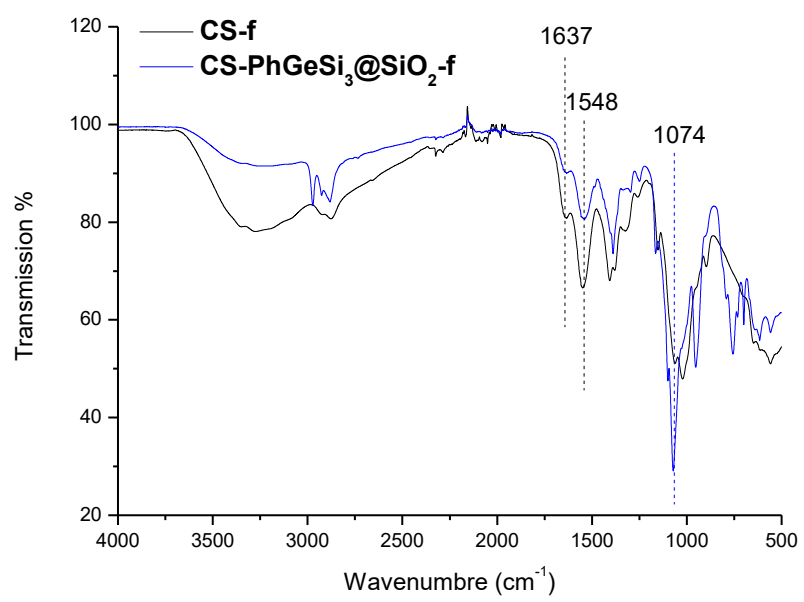

**S9. EDX of CS-Ph<sub>3</sub>GeSi@SiO<sub>2</sub>-f, CS-Ph<sub>2</sub>GeSi<sub>2</sub>@SiO<sub>2</sub>-f and CS-PhGeSi<sub>3</sub>@SiO<sub>2</sub>-f**

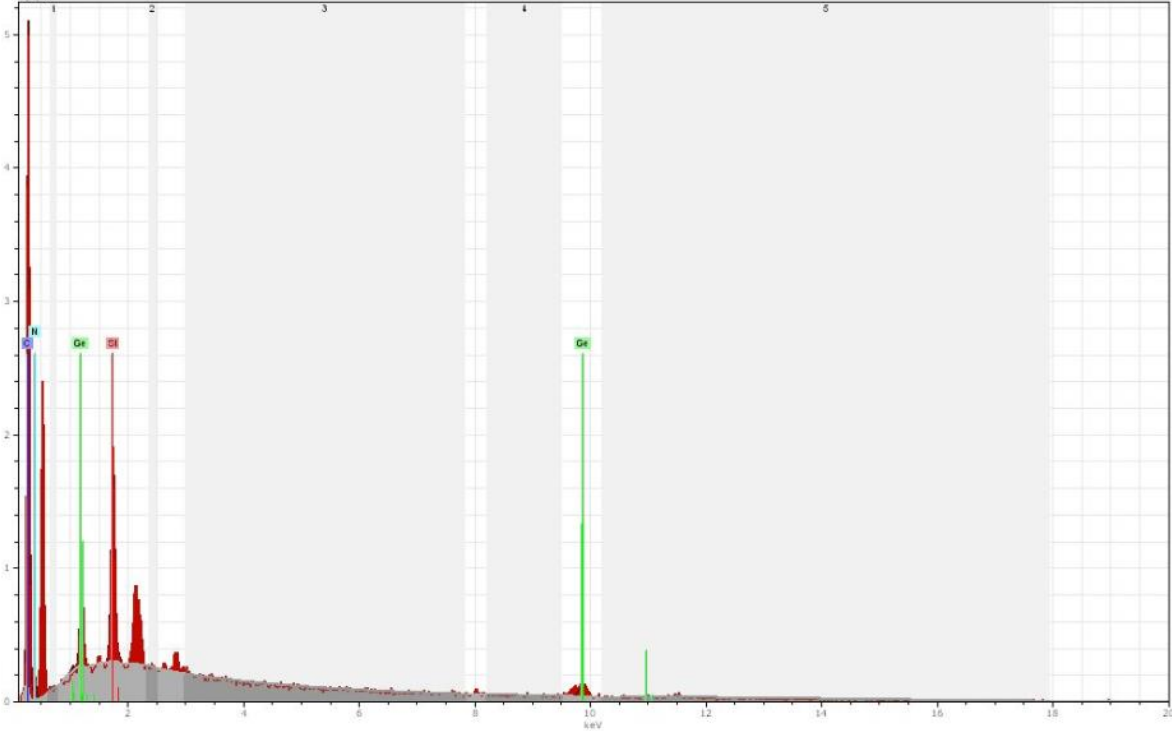

**CS-Ph<sub>3</sub>GeSi@SiO<sub>2</sub>-f**

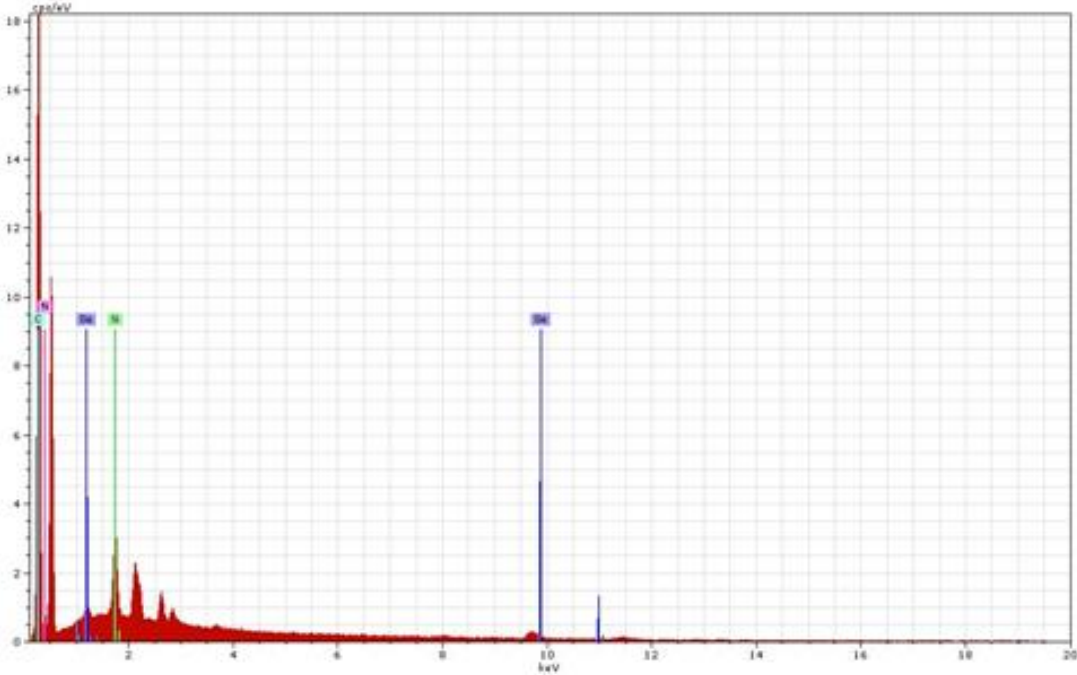

**CS-Ph<sub>2</sub>GeSi<sub>2</sub>@SiO<sub>2</sub>-f**

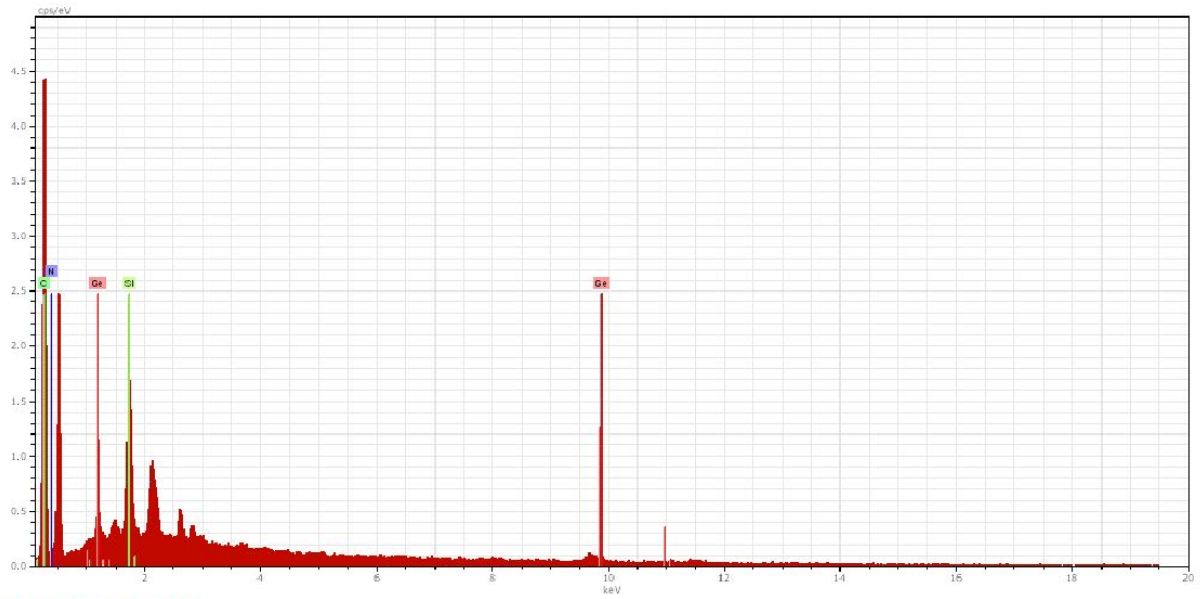

**CS-PhGeSi<sub>3</sub>@SiO<sub>2</sub>-f**

**S10. Digital photos and Infrared spectra of CS-Ph<sub>3</sub>GeSi@SiO<sub>2</sub>-f-150°C, CS-Ph<sub>2</sub>GeSi<sub>2</sub>@SiO<sub>2</sub>-f-150°C and CS-PhGeSi<sub>3</sub>@SiO<sub>2</sub>-f-150°C**

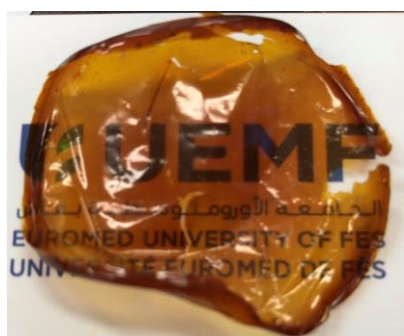

**CS-Ph<sub>3</sub>GeSi@SiO<sub>2</sub>-f-150°C**

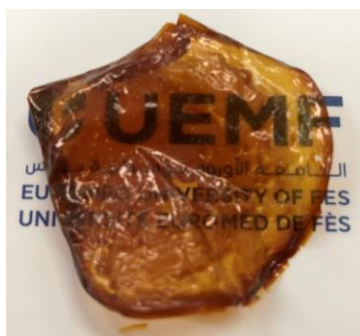

**CS-Ph<sub>2</sub>GeSi<sub>2</sub>@SiO<sub>2</sub>-f-150°C**

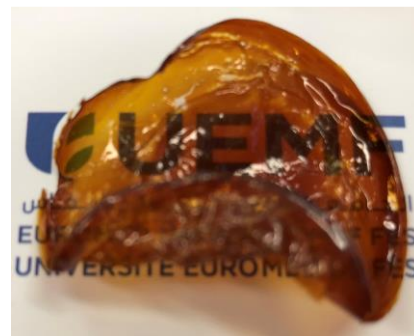

**CS-PhGeSi<sub>3</sub>@SiO<sub>2</sub>-f-150°C**

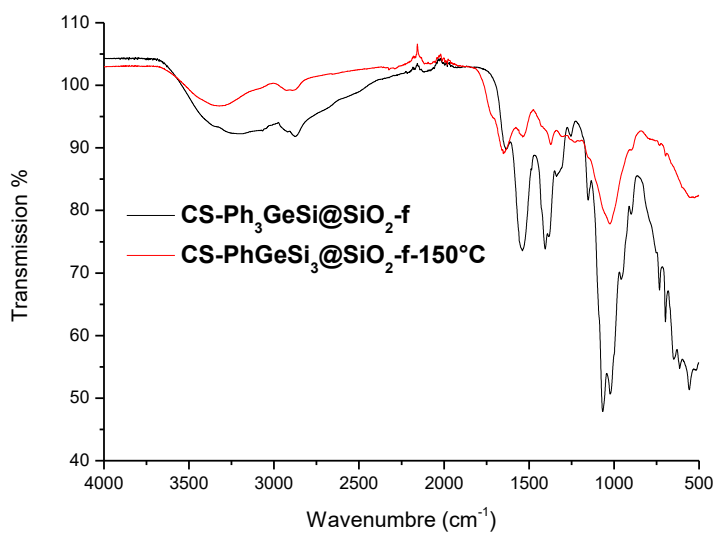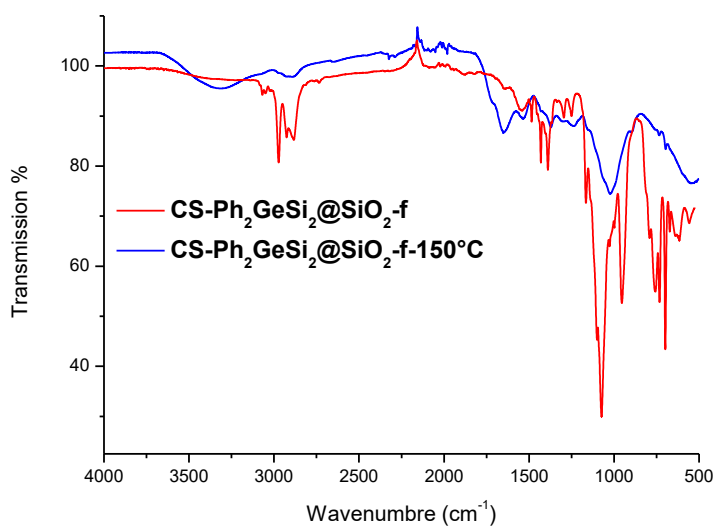

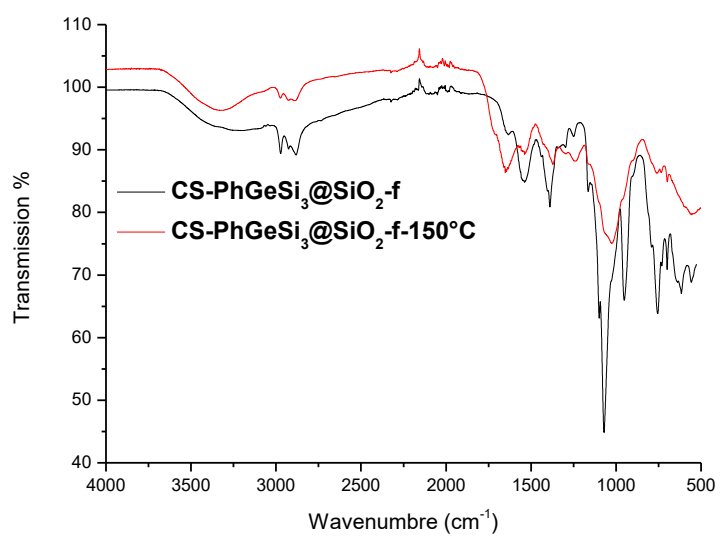

Supplement: d2nj02868a1.pdf [file d2nj02868a1.pdf]
